# Supplementary material
Source: PubMed Central journal article supplement (PMC6697534)
Supplement: EMS83919-supplement-Supplementary_Material.pdf [file EMS83919-supplement-Supplementary_Material.pdf]

## Supplementary Notes

Genes involved in flagella synthesis from *Desulfobacterium autotrophicum* HRM2 and *Candidatus Magnetomorum* sp. HK-1 were used to find homologues in the draft genome of the strain CR-1 in addition to the eggNOG analysis. None of the *flg*, *fla* and *fli* genes found in the genomes of *D. autotrophicum* and *Ca. Magnetomorum* sp. HK-1 have homologues in the genome of the ectosymbiont. Thus, it seems reasonable to state that MEB do not have the ability to synthesize flagella as suggested by the absence of flagella when cells are observed under the transmission electron microscope. A similar approach was used to search the major players in chemotaxis signal transduction pathway, i.e. the transmembrane methyl-accepting chemotaxis protein (MCP) receptors and cytosolic proteins (Che). Among all genes involved in this pathway detected in the genomes of *D. autotrophicum* and *Ca. Magnetomorum* sp. HK-1 none have homologues in the genome of the ectosymbiont.

The genome of strain CR-1 reveals the presence of a magnetosome gene cluster (MGC) in a region of 25 kb with features typical of a genomic island as previously described for MGC in magnetotactic bacteria<sup>1,2</sup>. Indeed, in the 5' and 3' vicinity of the MGC, two transposases (EPICR\_30004 and EPICR\_30007) and one integrase (EPICR\_30052) were found. The majority of the magnetosome genes had a maximum similarity to those of *Desulfamplus magnetovallimortis* and *Ca. Magnetomorum* sp. HK-1 (Supplementary Table S2), the two most closely related magnetite-producing magnetotactic bacteria with their genome sequenced (Fig. 3b). Synteny of the magnetosome genes with those of *Desulfamplus magnetovallimortis*<sup>3</sup> and *Ca. Magnetomorum* sp. HK-1<sup>4</sup> is also reasonably conserved (Fig. 3d).

## Supplementary References

1. Ullrich, S., Kube, M., Schübbe, S., Reinhardt, R. & Schüler, D. A hypervariable 130-kilobase genomic region of *Magnetospirillum gryphiswaldense* comprises a magnetosome island which undergoes frequent rearrangements during stationary growth. *J. Bacteriol.* **187**, 7176–7184 (2005).
2. Nakazawa, H. *et al.* Whole genome sequence of *Desulfovibrio magneticus* strain RS-1 revealed common gene clusters in magnetotactic bacteria. *Genome Res.* **19**, 1801–1808 (2009).

3. Lefèvre, C. T. *et al.* Comparative genomic analysis of magnetotactic bacteria from the Deltaproteobacteria provides new insights into magnetite and greigite magnetosome genes required for magnetotaxis. *Environ. Microbiol.* **15**, 2712–2735 (2013).
4. Kolinko, S., Richter, M., Glöckner, F.-O., Brachmann, A. & Schüler, D. Single-cell genomics reveals potential for magnetite and greigite biomineralization in an uncultivated multicellular magnetotactic prokaryote. *Environ. Microbiol. Rep.* **6**, 524–531 (2014).
5. Loy, A. *et al.* Oligonucleotide Microarray for 16S rRNA Gene-Based Detection of All Recognized Lineages of Sulfate-Reducing Prokaryotes in the Environment. *Appl. Environ. Microbiol.* **68**, 5064–5081 (2002).
6. Lückner, S. *et al.* Improved 16S rRNA-targeted probe set for analysis of sulfate-reducing bacteria by fluorescence in situ hybridization. *J. Microbiol. Methods* **69**, 523–528 (2007).
7. Edgcomb, V. P. *et al.* Identity of epibiotic bacteria on symbiontid euglenozoans in O<sub>2</sub>-depleted marine sediments: evidence for symbiont and host co-evolution. *ISME J.* **5**, 231–243 (2011).
8. Snaidr, J., Amann, R., Huber, I., Ludwig, W. & Schleifer, K. H. Phylogenetic analysis and in situ identification of bacteria in activated sludge. *Appl. Environ. Microbiol.* **63**, 2884–2896 (1997).
9. Monteil, C. L. *et al.* Accumulation and Dissolution of Magnetite Crystals in a Magnetically Responsive Ciliate. *Appl. Environ. Microbiol.* **84**, (2018).
10. Amann, R. I. *et al.* Combination of 16S rRNA-targeted oligonucleotide probes with flow cytometry for analyzing mixed microbial populations. *Appl. Environ. Microbiol.* **56**, 1919–1925 (1990).

**Supplementary Video 1.** Light microscope video showing south-seeking magnetic protists sampled from Carry-le-Rouet, Mediterranean Sea, swimming toward and aggregating at the edge of a hanging drop. Reversing the bar magnet so that the south magnetic pole is closest to the edge of the drop, conducts the organisms to rotate and swim in the opposite direction, toward the opposite edge of the drop. While some magnetic protists are stuck at the edge of the drop, most of them reverse their swimming direction when the polarity of the bar magnet is changed.

## Supplementary Figures

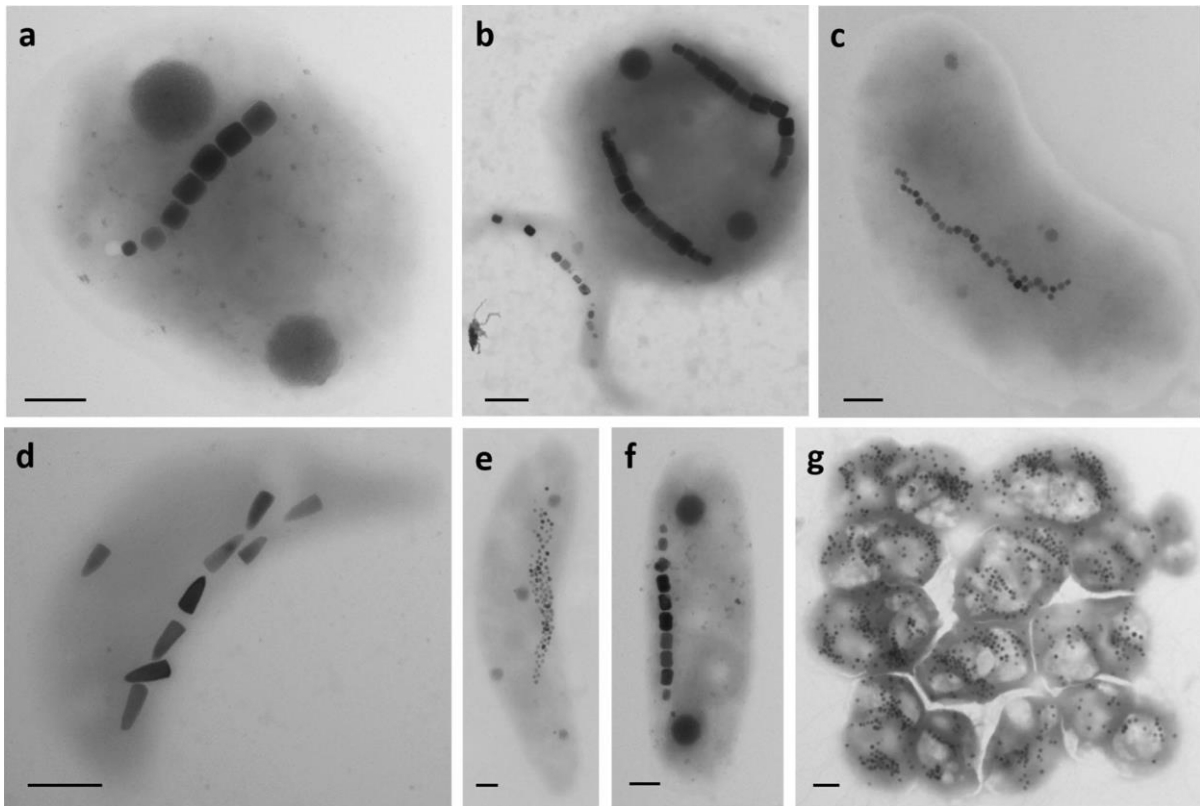

**Supplementary Fig. 1.** Transmission electron micrographs of north-seeking, free-living, magnetotactic cocci (**a**, **b**), spirillum (**b**), curved rods (**c-e**), rod (**f**) and multicellular prokaryotes (**g**), isolated from sediments collected from the Mediterranean Sea at Carry-le-Rouet, France. Scale bars represent 0.2  $\mu\text{m}$ .

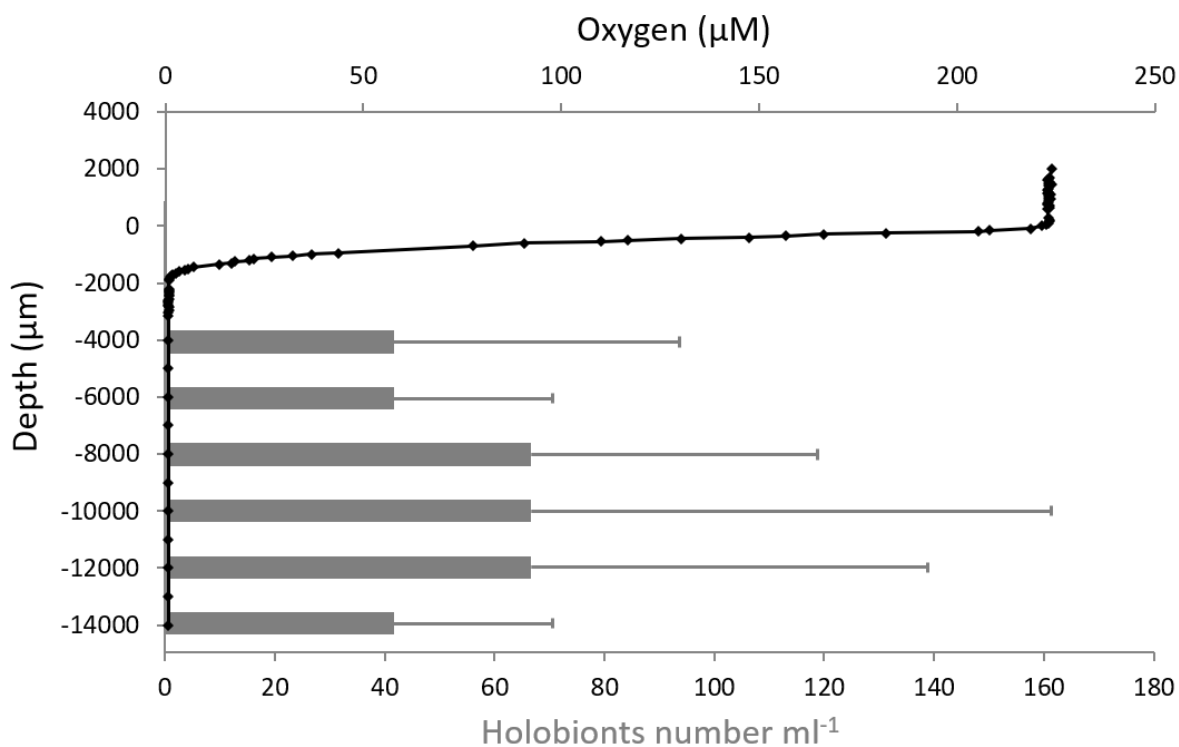

**Supplementary Fig. 2.** Vertical concentration profiles of oxygen and the magnetic protists through the water column and surface sediments of a bottle sample (microcosm) collected from Carry-le-Rouet, Mediterranean Sea. Note the measurements extend through the oxic–anoxic interface and the upper regions of the anaerobic zone of the sediment. Cell counts are reported as the mean of independent biological triplicate measurements and line extensions represent the positive standard deviation. The high variance is due to the technique used to count a low number of magnetic protist (see Methods).

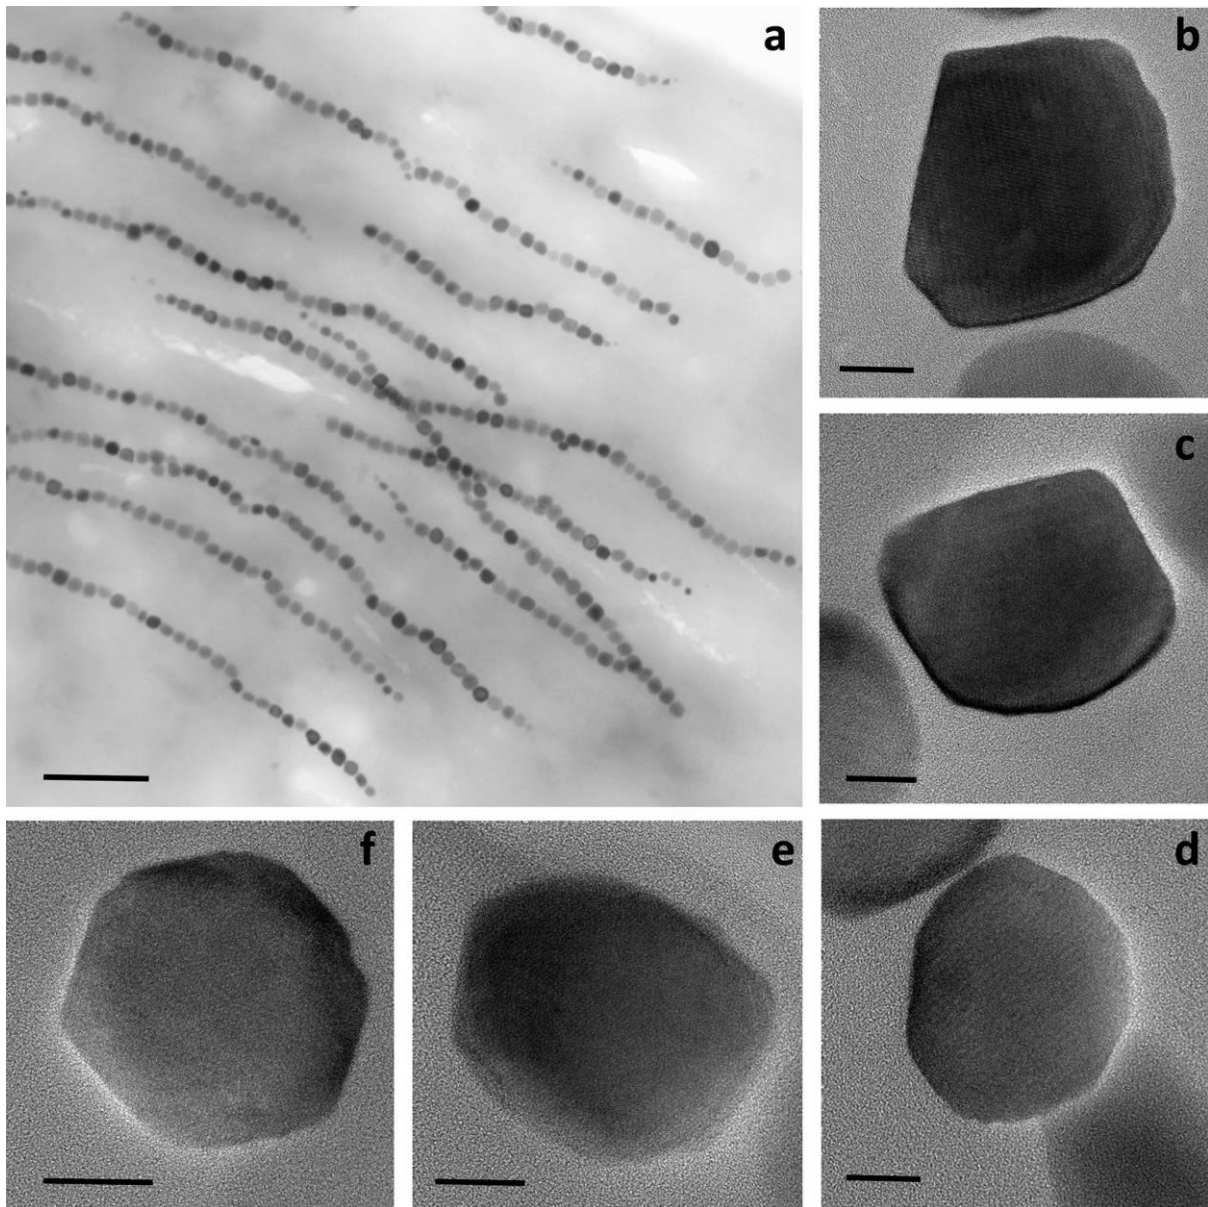

**Supplementary Fig. 3.** Transmission electron microscope (TEM) (a) and high-resolution TEM (b-f) images of magnetosomes produced by the ectosymbiotic magnetic bacteria collected from Carry-le-Rouet, showing the organization of the magnetosomes within the prokaryotic cells and their non-isometric, prismatic morphologies. Interestingly, magnetosomes from the same chain exhibit some variations of shape. Scale bars represent 500 nm (a) and 20 nm (b-f).

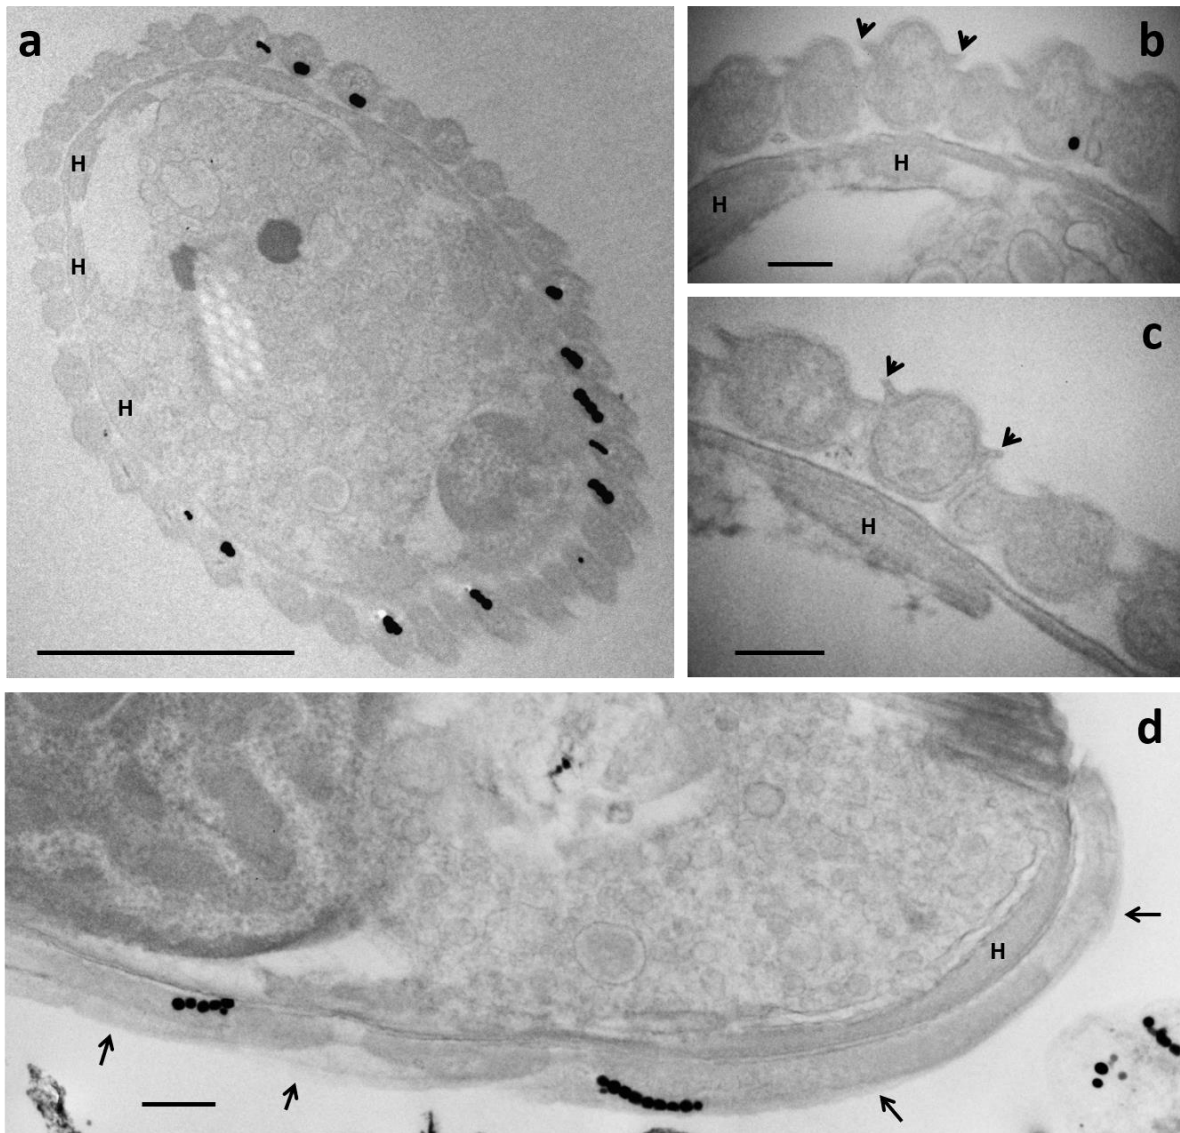

**Supplementary Fig. 4.** Transmission electron micrographs showing the organization and ultrastructure of the ectosymbiotic magnetic bacteria isolated from Carry-le-Rouet. **a**, Cross section of a magnetic consortium showing the presence of 41 bacteria surrounding the euglenozoan host. **b**, **c**, Cross sections of the ectosymbiotic bacteria showing their ultrastructure and their disposition at the surface of their host. Wing-like projections are shown with arrowheads. **d**, Longitudinal section of the ectosymbiotic bacteria showing possible mucilage (arrows) at the surface of the prokaryotic cell. In all panels, **H** represents hydrogenosomes. Scale bars represent 2  $\mu\text{m}$  (**a**), 0.2  $\mu\text{m}$  (**b** and **c**) and 0.5  $\mu\text{m}$  (**d**).

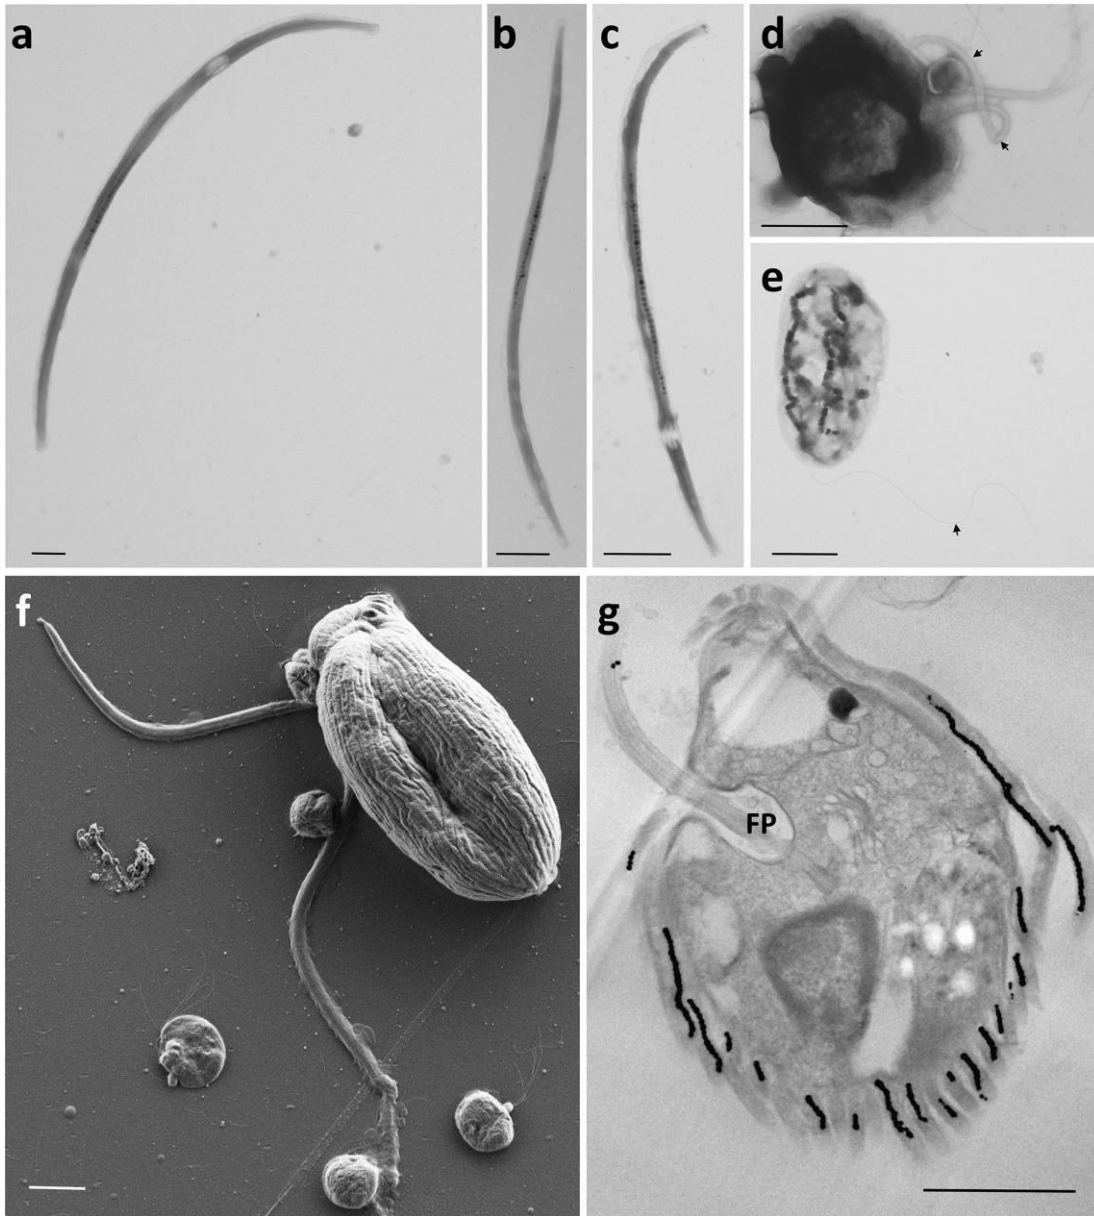

**Supplementary Fig. 5.** Transmission electron micrographs of magnetic ectosymbiotic bacteria detached from the surface of their host (**a-c**) and free-living magnetotactic bacteria (**d** and **e**) collected from the same sample in Carry-le-Rouet. Cells were negatively stained with uranyl acetate 1%, showing the absence of flagella surrounding the ectosymbionts while for the magnetotactic bacteria two flagella bundles (**e**) and one single polar flagellum (**f**) are observed (black arrows). **f**, Scanning electron image of a magnetic protist isolated from Carry-le-Rouet showing the presence of two thick flagella belonging to the protist. In comparison bundle of thin flagella can be seen around bacteria surrounding the magnetic protist. **g**, Transmission electron microscope of a thin-sectioned magnetic protist isolated from Carry-le Rouet showing that these flagella emerge from a flagellar pocket (**FP**). Scale bars represent 0.5  $\mu\text{m}$  (**a-e**) and 2  $\mu\text{m}$  (**f, g**).



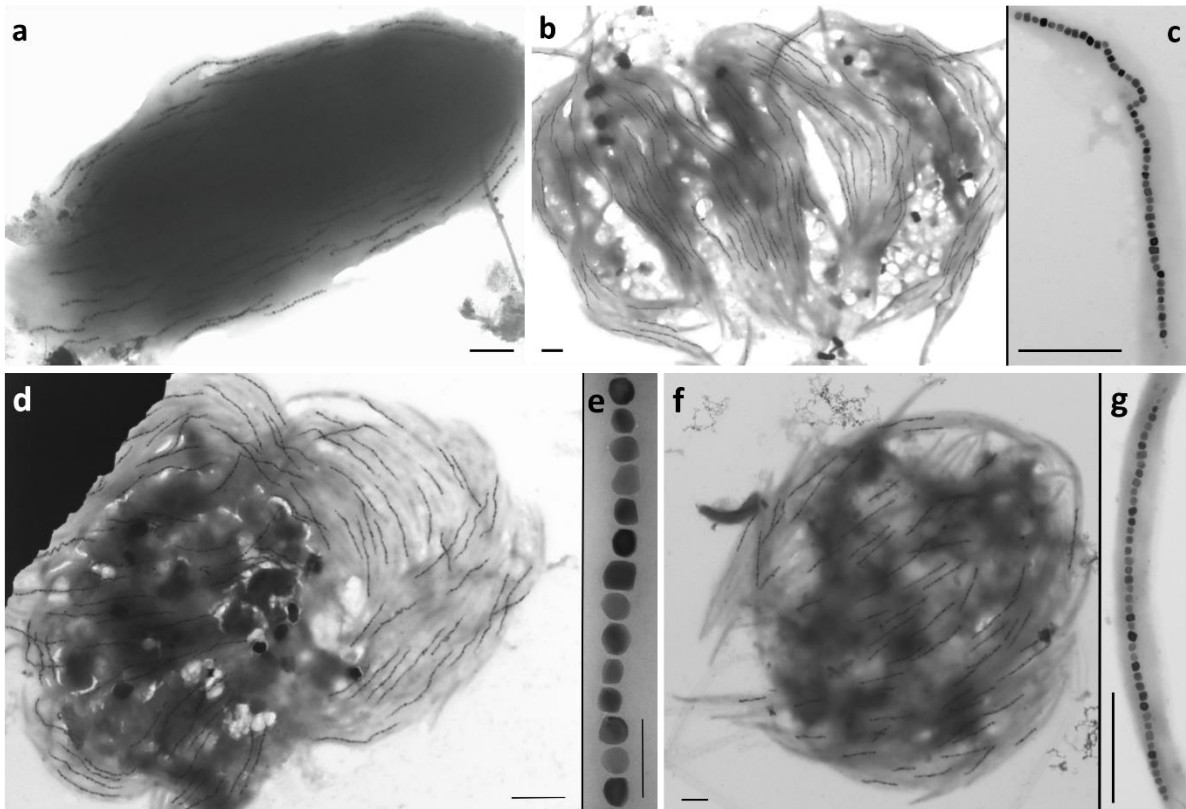

**Supplementary Fig. 6.** Transmission electron micrographs of south-seeking (**a**, **b**, **d**) or north-seeking (**f**) magnetic protists isolated from sediments collected in Port Leucate (**a**), Port de Boulouris (**b**), Cap de Creus (**d**) and Akaroa (**f**). Panels **c**, **e** and **g** are magnetosome chains of ectosymbionts from panels **a**, **b** and **d**, respectively. Scale bars represent 0.5  $\mu\text{m}$  (**a**, **b**, **c**, **f** and **g**), 2  $\mu\text{m}$  (**d**) and 200 nm (**e**).

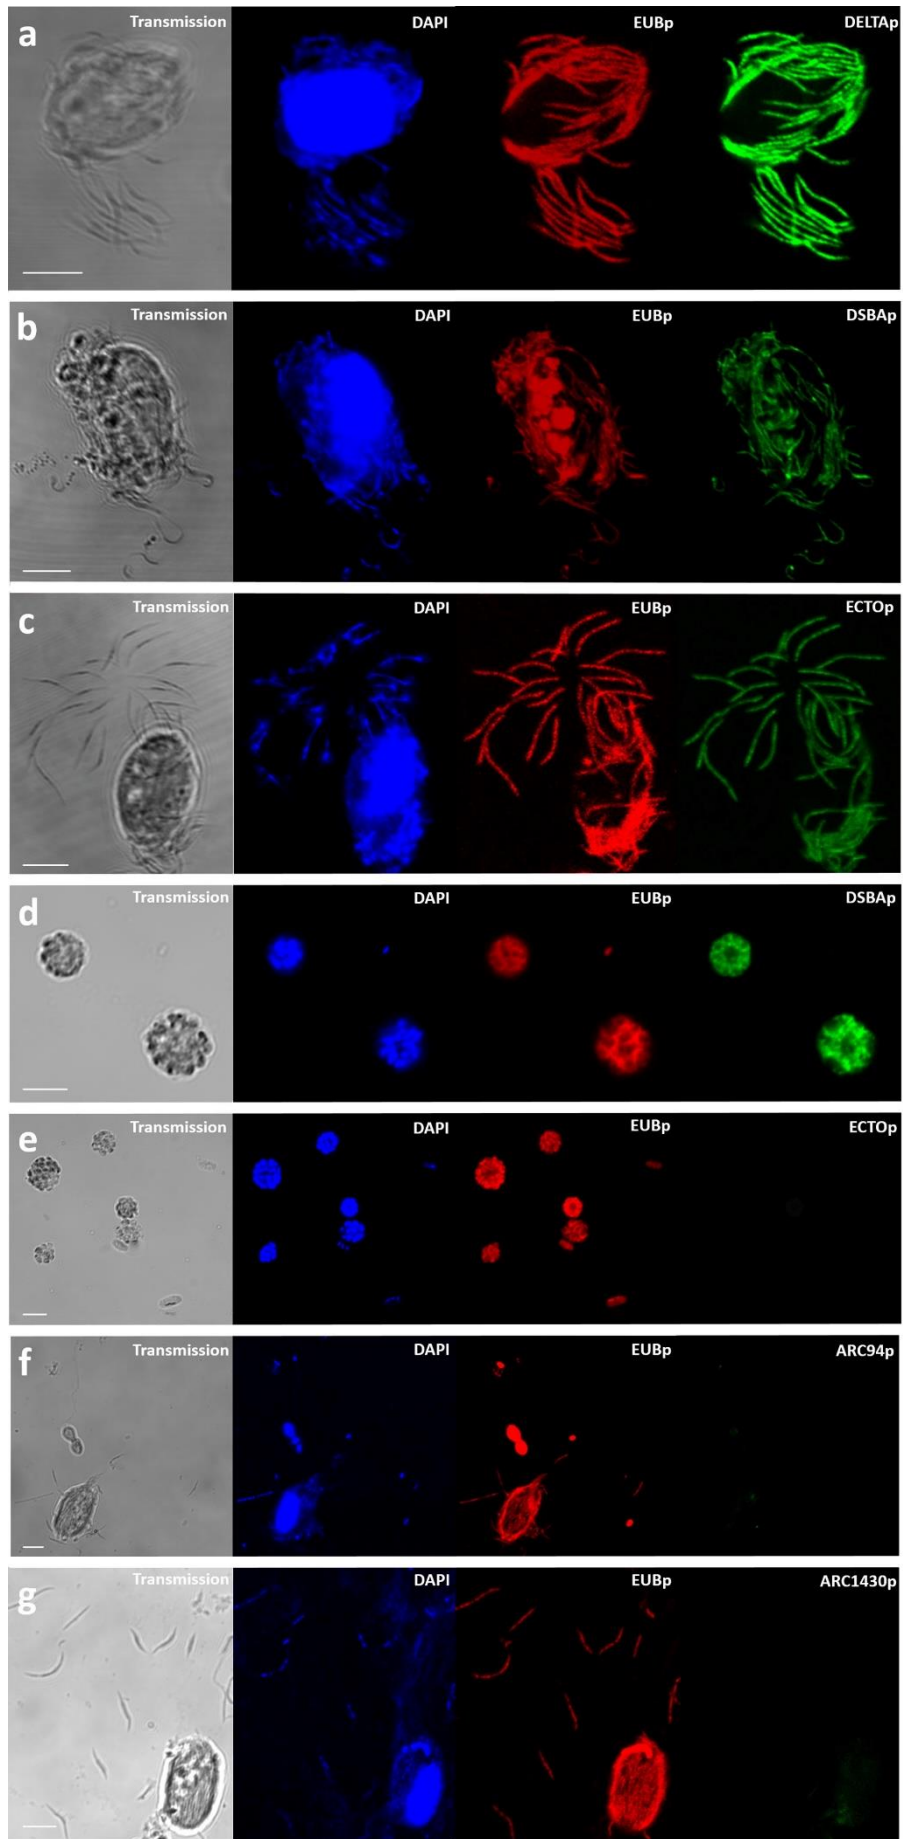

**Supplementary Fig. 7.** Fluorescence *in situ* hybridization (FISH) of magnetically collected protists from Carry-le-Rouet, Mediterranean Sea, showing that the ectosymbiotic bacteria is a deltaproteobacterium (**a**, probe DELTAp-ATTO488)<sup>5</sup> affiliated to the Desulfobacteraceae (**b**, DSBAp-ATTO488)<sup>6</sup> that hybridized with the ECTO-specific ATTO488-labeled probe ECTOp (5'- CAGTTTCTTCCCCTTGAC-3', complementary to nucleotides close to the 421 bp region of the 16S rRNA molecule of the ectosymbiotes) (**c**). The north-seeking multicellular magnetotactic bacteria present in the same sample as the magnetic protists were used as positive controls for DSBAp (**d**) and as negative controls for ECTOp (**e**). In order to discriminate from the ectosymbiotic bacteria previously identified from the surface of *C. aureus* and *B. bacati*<sup>7</sup>, the *Arcobacter*-specific probes ARC94p (**f**) and ARC1430p (**g**)<sup>8</sup> were tested. Both probes did not hybridize the 16S rRNA gene sequence of the magnetic ectosymbiotic bacteria. Scale bars represent 5  $\mu$ m.

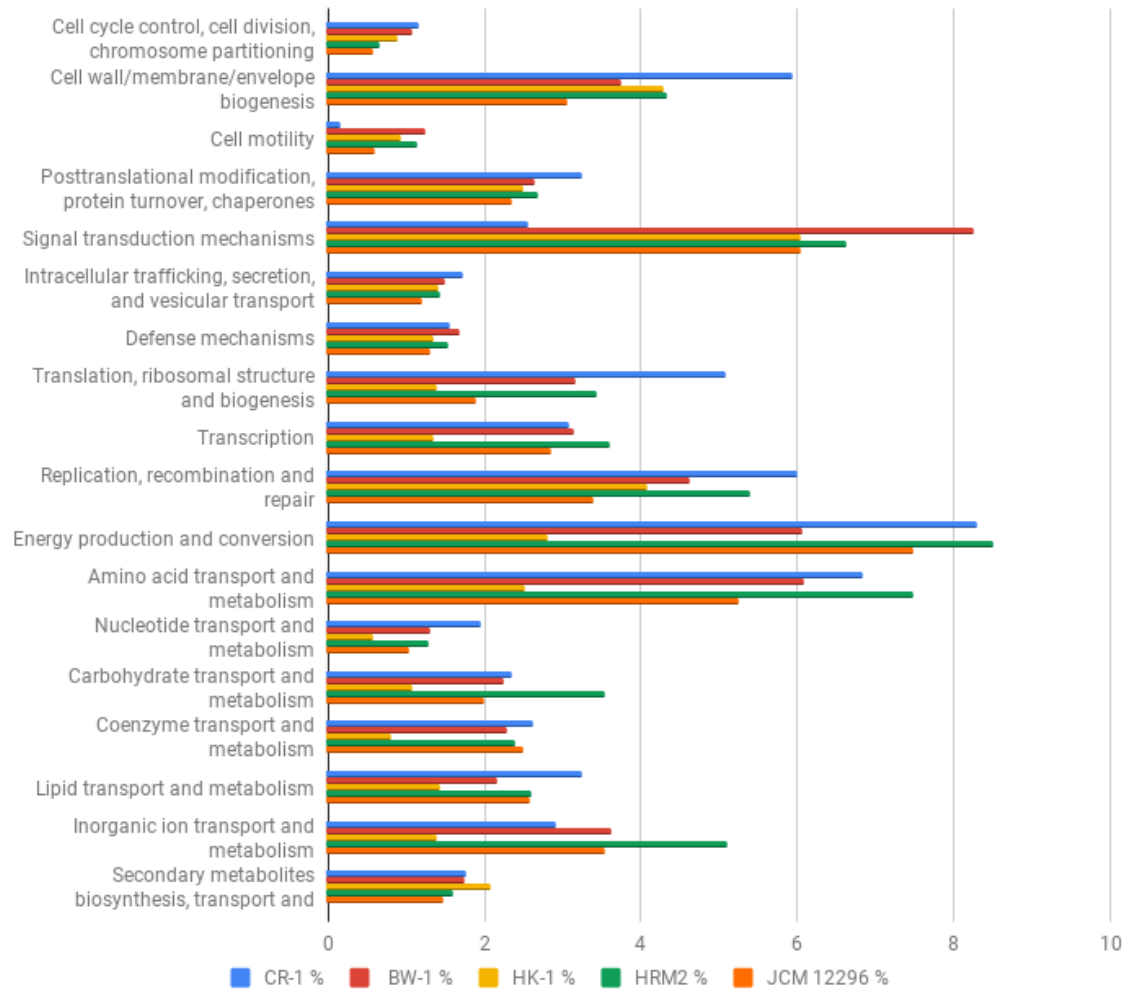

**Supplementary Fig. 8.** Functional classification of protein-coding genes from *Ca. Desulfarcum epimagneticum* compared to free-living magnetotactic and non-magnetotactic *Desulfocateraceae* species. This bar chart represents the percentage of protein-coding genes classified according to eggNOG functional categories for *Ca. Desulfarcum epimagneticum* CR-1, *Desulfamplus magnetovallimortis* BW-1, *Ca. Magnetomorum* HK-1, *Desulfobacterium autotrophicum* HRM2 and *Desulfosarcina cetonica* JCM 12296.

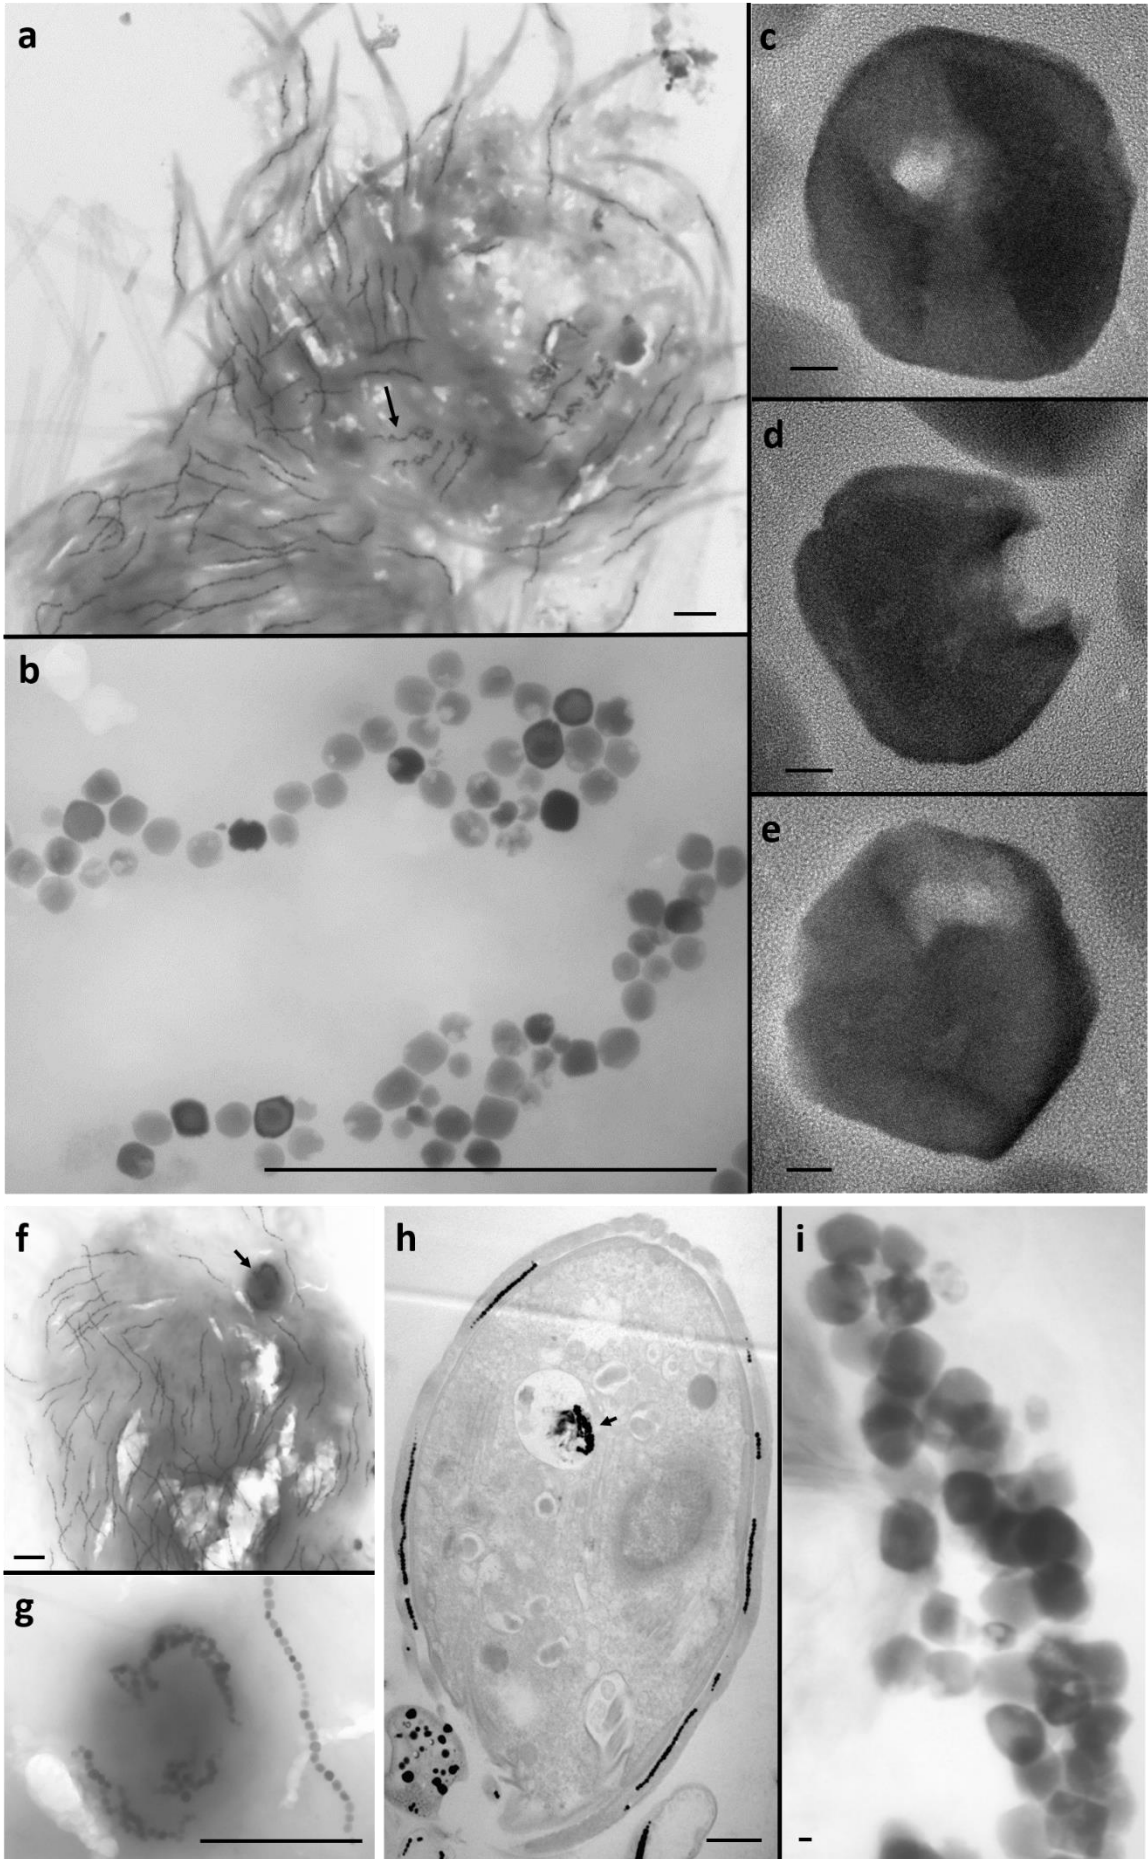

**Supplementary Fig. 9.** TEM images showing the presence of degraded magnetosomes inside euglenozoan hosts sampled from Carry-le-Rouet. Arrows in panels **a**, **f** and **h** indicate the position of the magnetosome chains shown in panels **b**, **g** and **i**, respectively. **c-e**, High-resolution TEM images of magnetite magnetosomes from panel **b**, showing structural defects due to partial dissolution, which has been previously reported for grazed magnetotactic bacteria<sup>9</sup>. Partially dissolved magnetosomes are similar to those biomineralized by the ectosymbionts, which indicates their ingestion by their host. Scale bars represent 1 $\mu$ m (**a**, **b**, **f**, **g** and **h**) and 10 nm (**c-e** and **i**).

## Supplementary Tables

**Supplementary Table 1.** Comparison of size and number of CDS from 25 genomes of strains of the Desulfobacteraceae family indicates a genome reduction of *Ca. Desulfarcum epimagneticum* strain CR-1.

| Strains                                                | Genome size (Mb) | Number of CDS | % completion (CheckM) |
|--------------------------------------------------------|------------------|---------------|-----------------------|
| <i>Ca. Desulfarcum epimagneticum</i> CR-1              | 3.26             | 3013          | 98.1                  |
| <i>Ca. Magnetomorum</i> sp. HK-1                       | 14.59            | 12387         | 96.9                  |
| <i>Ca. Magnetoglobus multicellularis</i> str. Araruama | 12.82            | 13649         | 98.2                  |
| <i>Desulfatibacillum alkenivorans</i> AK-01            | 6.52             | 5480          | 99.4                  |
| <i>Desulfatibacillum alkenivorans</i> DSM 16219        | 6.48             | 5330          | 98.1                  |
| <i>Desulfatibacillum aliphaticivorans</i> DSM 15576    | 6.48             | 5528          | 98.7                  |
| <i>Desulfatitalea tepidiphila</i> S28bF                | 5.62             | 5798          | 99.0                  |
| <i>Desulfosarcina cetonica</i> JCM 12296               | 7.15             | 10716         | 94.4                  |
| <i>Desulfoluna spongiiphila</i> AA1                    | 6.54             | 6674          | 99.4                  |
| <i>Desulfobacter postgatei</i> 2ac9                    | 3.97             | 3786          | 100                   |
| <i>Desulfobacter vibrioformis</i> DSM 8776             | 4.47             | 4030          | 96.1                  |
| <i>Desulfobacter curvatus</i> DSM 3379                 | 5.67             | 5094          | 99.9                  |
| <i>Desulfobacula toluolica</i> Tol2                    | 5.20             | 4912          | 99.4                  |
| <i>Desulfobacula phenolica</i> DSM 3384                | 4.88             | 4515          | 99.4                  |
| <i>Desulfamplus magnetovallimortis</i> BW-1            | 6.78             | 5610          | 96.9                  |
| <i>Desulfobacterium autotrophicum</i> HRM2             | 5.66             | 5200          | 99.4                  |
| <i>Desulfobacterium vacuolatum</i> DSM 3385            | 5.04             | 4288          | 98.7                  |
| <i>Desulfotignum phosphitoxidans</i> DSM 13687         | 5.00             | 4750          | 99.4                  |
| <i>Desulfotignum balticum</i> DSM 7044                 | 5.12             | 4799          | 99.4                  |
| <i>Desulfospira joergensenii</i> DSM 10085             | 6.12             | 5542          | 99.4                  |
| <i>Desulforegula conservatrix</i> Mb1Pa                | 4.48             | 4303          | 99.4                  |
| <i>Desulfofaba hansenii</i> P1                         | 6.73             | 5848          | 99.3                  |
| <i>Desulfococcus oleovorans</i> Hxd3                   | 3.94             | 3592          | 99.4                  |
| <i>Desulfococcus multivorans</i> DSM 2059              | 4.42             | 4195          | 98.4                  |
| <i>Desulfatirhabdium butyrativorans</i> DSM 18734      | 4.49             | 3953          | 99.3                  |
| <i>Desulfatiglans anilini</i> DSM 4660                 | 4.68             | 4745          | 99.4                  |
| <b>Average</b>                                         | <b>6.06</b>      | <b>5720</b>   | <b>98.6</b>           |

**Supplementary Table 3.** 16S rRNA-targeted oligonucleotide probes used in this study.

| <b>Probe</b> | <b>Specificity</b>       | <b>Sequence (5'-3') of probe</b> | <b>% FA</b> | <b>Reference</b> |
|--------------|--------------------------|----------------------------------|-------------|------------------|
| EUB338       | Most Bacteria            | GCTGCCTCCCGTAGGAGT               | 20 or 35    | <sup>10</sup>    |
| ECTO         | Ectosymbiontes           | CAGTTTCTTCCCACCTTGAC             | 35          | This study       |
| DELTA495a    | Most Deltaproteobacteria | AGTTAGCCGGTGCTTCCT               | 35          | <sup>5</sup>     |
| DSBA355      | Most Desulfobacteraceae  | CCATTGCGCAAATTCCTCAC             | 35          | <sup>6</sup>     |
| ARC94        | <i>Arcobacter</i>        | TGCGCCACTTAGCTGACA               | 20          | <sup>8</sup>     |
| ARC1430      | <i>Arcobacter</i>        | TTAGCATCCCCGCTTCGA               | 20          | <sup>8</sup>     |

Abbreviations: FA, formamide



**Supplementary Table 2.** List of proteins involved in metabolic pathways found in the draft genome of *Ca. Desulfarcum epimagneticum* strain CR-1.

| Protein name/<br>gene number                | Function                 | Size<br>(amino acids) | Type bacterium with<br>protein with highest<br>sequence identity | Accession<br>number | e-value  | Coverage<br>(%) | Identity<br>(%) |
|---------------------------------------------|--------------------------|-----------------------|------------------------------------------------------------------|---------------------|----------|-----------------|-----------------|
| <b>AprA</b><br><a href="#">EPICR_10322</a>  | Sulphate-reduction       | 659                   | <i>Desulfatitalea tepidiphila</i>                                | WP_054029362        | 0        | 100             | 86              |
| <b>AprB</b><br><a href="#">EPICR_10323</a>  | Sulphate-reduction       | 145                   | <i>Desulfosarcina cetonica</i>                                   | WP_054689150        | 2.00E-94 | 97              | 94              |
| <b>QmoA</b><br><a href="#">EPICR_10321</a>  | Sulphate-reduction       | 424                   | <i>Desulfatibacillum alkenivorans</i>                            | WP_012610700        | 0        | 99              | 82              |
| <b>QmoB</b><br><a href="#">EPICR_10320</a>  | Sulphate-reduction       | 778                   | <i>Desulfococcus multivorans</i>                                 | WP_020877727        | 0        | 100             | 77              |
| <b>QmoC</b><br><a href="#">EPICR_10319</a>  | Sulphate-reduction       | 377                   | <i>Desulfatirhabdium butyrativorans</i>                          | WP_028323500        | 0        | 99              | 66              |
| <b>DsrA</b><br><a href="#">EPICR_30056</a>  | Sulphate-reduction       | 437                   | <i>Ca. Magnetoglobus multicellularis</i>                         | ETR70947            | 0        | 99              | 85              |
| <b>DsrB</b><br><a href="#">EPICR_30057</a>  | Sulphate-reduction       | 209                   | <i>Desulfobacterium vacuolatum</i>                               | WP_084067365        | 0        | 100             | 84              |
| <b>HynA</b><br><a href="#">EPICR_30147</a>  | Hydrogen oxidation       | 458                   | <i>Desulfatirhabdium butyrativorans</i>                          | WP_028324338        | 0        | 100             | 77              |
| <b>HynB</b><br><a href="#">EPICR_30145</a>  | Hydrogen oxidation       | 313                   | <i>Desulfatirhabdium butyrativorans</i>                          | WP_028324337        | 0        | 100             | 82              |
| <b>HynC</b><br><a href="#">EPICR_30148</a>  | Hydrogen oxidation       | 168                   | <i>Desulfosarcina cetonica</i>                                   | WP_054699651        | 4.00E-73 | 95              | 68              |
| <b>CdhE</b><br><a href="#">EPICR_50265</a>  | CO <sub>2</sub> fixation | 446                   | <i>Alkalispirochaeta odontotermitis</i>                          | WP_037563761        | 0        | 100             | 79              |
| <b>CdhC</b><br><a href="#">EPICR_50266</a>  | CO <sub>2</sub> fixation | 737                   | <i>Alkalispirochaeta odontotermitis</i>                          | WP_037563760        | 0        | 100             | 84              |
| <b>CdhA</b><br><a href="#">EPICR_50267</a>  | CO <sub>2</sub> fixation | 673                   | <i>Desulfobacula phenolica</i>                                   | WP_092229394        | 0        | 98              | 84              |
| <b>CdhD</b><br><a href="#">EPICR_50268</a>  | CO <sub>2</sub> fixation | 521                   | <i>Desulfococcus oleovorans</i>                                  | WP_012176599        | 0        | 99              | 65              |
| Unknown<br><a href="#">EPICR_30018</a>      | Magnetosome formation    | 132                   | <i>Ca. Magnetomorum</i> sp. HK-1                                 | KPA16224            | 1.00E-13 | 65              | 34              |
| <b>MamK1</b><br><a href="#">EPICR_30019</a> | Magnetosome formation    | 362                   | <i>Magnetococcus marinus</i>                                     | WP_011713881        | 3.00E-90 | 64              | 43              |

|                                                 |                       |     |                                                      |              |           |    |    |
|-------------------------------------------------|-----------------------|-----|------------------------------------------------------|--------------|-----------|----|----|
| <b>MamK2</b><br><a href="#">EPICR 30020</a>     | Magnetosome formation | 361 | <i>Magnetospirillum magneticum</i>                   | WP_041039444 | 1.00E-103 | 67 | 45 |
| Unknown<br><a href="#">EPICR 30021</a>          | Magnetosome formation | 379 | <i>Ca. Magnetomorum</i> sp. HK-1                     | KPA14592     | 2.00E-18  | 86 | 22 |
| <b>Mad10</b><br><a href="#">EPICR 30022</a>     | Magnetosome formation | 128 | <i>Ca. Magnetobacterium casensis</i>                 | WP_040335342 | 5.00E-07  | 76 | 32 |
| Unknown<br><a href="#">EPICR 30023</a>          | Unknown               | 55  | -                                                    | -            | -         | -  | -  |
| <b>Mad31</b><br><a href="#">EPICR 30024</a>     | Magnetosome formation | 310 | <i>Ca. Magnetobacterium bavaricum</i>                | KJU84849     | 2.00E-31  | 66 | 35 |
| <b>Mad30-1</b><br><a href="#">EPICR 30025</a>   | Magnetosome formation | 225 | <i>Desulfonatronum lacustre</i>                      | WP_084031902 | 8.00E-102 | 96 | 64 |
| <b>MamI-1</b><br><a href="#">EPICR 30026</a>    | Magnetosome formation | 60  | <i>Desulfamplus magnetovallimortis</i>               | WP_080798181 | 1.00E-17  | 95 | 67 |
| <b>MamA</b><br><a href="#">EPICR 30027</a>      | Magnetosome formation | 258 | <i>Ca. Magnetomorum</i> sp. HK-1                     | KPA19039     | 7.00E-50  | 80 | 43 |
| <b>Mad1</b><br><a href="#">EPICR 30028</a>      | Magnetosome formation | 238 | <i>Ca. Magnetomorum</i> sp. HK-1                     | KPA19040     | 6.00E-72  | 86 | 59 |
| <b>MamI-2</b><br><a href="#">EPICR 30029</a>    | Magnetosome formation | 120 | <i>Desulfamplus magnetovallimortis</i>               | WP_080798190 | 1.00E-28  | 94 | 48 |
| <b>MamQ</b><br><a href="#">EPICR 30030</a>      | Magnetosome formation | 263 | <i>Ca. Magnetomorum</i> sp. HK-1                     | KPA19042     | 4.00E-57  | 97 | 42 |
| <b>Mad2</b><br><a href="#">EPICR 30031</a>      | Magnetosome formation | 166 | <i>Desulfamplus magnetovallimortis</i>               | WP_080798196 | 5.00E-69  | 95 | 67 |
| <b>MamB</b><br><a href="#">EPICR 30033</a>      | Magnetosome formation | 310 | <i>Ca. Magnetomorum</i> sp. HK-1                     | KPA19045     | 3.00E-109 | 97 | 54 |
| <b>MamP</b><br><a href="#">EPICR 30034</a>      | Magnetosome formation | 503 | <i>Desulfamplus magnetovallimortis</i>               | WP_080798201 | 9.00E-93  | 93 | 38 |
| <b>MamE-Cter</b><br><a href="#">EPICR 30035</a> | Magnetosome formation | 616 | <i>Desulfamplus magnetovallimortis</i>               | WP_080798204 | 3.00E-132 | 98 | 40 |
| <b>MamEO</b><br><a href="#">EPICR 30036</a>     | Magnetosome formation | 611 | <i>Ca. Magnetomorum</i> sp. HK-1                     | KPA19048     | 0         | 87 | 49 |
| <b>MamE-Nter</b><br><a href="#">EPICR 30037</a> | Magnetosome formation | 312 | <i>Desulfonatronum thiodismutans</i> st. <i>ML-1</i> | AFZ77020     | 2.00E-74  | 98 | 46 |
| <b>Mad4</b><br><a href="#">EPICR 30038</a>      | Magnetosome formation | 148 | <i>Ca. Magnetomorum</i> sp. HK-1                     | KPA19051     | 1.00E-17  | 85 | 39 |
| <b>Mad6</b><br><a href="#">EPICR 30039</a>      | Magnetosome formation | 286 | <i>Desulfonatronum thiodismutans</i> st. <i>ML-1</i> | AFZ77023     | 9.00E-99  | 98 | 50 |
| <b>MamI-3</b><br><a href="#">EPICR 30040</a>    | Magnetosome formation | 132 | <i>Ca. Magnetomorum</i> sp. HK-1                     | KPA16230     | 2.00E-11  | 65 | 37 |

|                                                |                       |     |                                                      |              |           |    |    |
|------------------------------------------------|-----------------------|-----|------------------------------------------------------|--------------|-----------|----|----|
| <b>MamL</b><br><a href="#">EPICR 30041</a>     | Magnetosome formation | 90  | <i>Ca. Magnetomorum</i> sp. HK-1                     | KPA16229     | 2.00E-18  | 97 | 46 |
| <b>MamM</b><br><a href="#">EPICR 30042</a>     | Magnetosome formation | 302 | <i>Desulfamplus magnetovallimortis</i>               | WP_080798224 | 1.00E-113 | 94 | 58 |
| <b>Mad7</b><br><a href="#">EPICR 30043</a>     | Magnetosome formation | 152 | <i>Desulfovibrio magneticus</i>                      | BAH77592     | 1.00E-06  | 82 | 33 |
| <b>Mad8</b><br><a href="#">EPICR 30044</a>     | Magnetosome formation | 119 | <i>Desulfovibrio magneticus</i>                      | WP_015862720 | 6.00E-20  | 85 | 50 |
| <b>Mad23</b><br><a href="#">EPICR 30045</a>    | Magnetosome formation | 524 | <i>Ca. Magnetobacterium casensis</i>                 | WP_040335329 | 1.00E-25  | 46 | 35 |
| <b>Mad9</b><br><a href="#">EPICR 30046</a>     | Magnetosome formation | 137 | <i>Desulfonatronum thiodismutans</i> st. <i>ML-1</i> | AFZ77030     | 1.00E-40  | 95 | 51 |
| <b>Mad17-1</b><br><a href="#">EPICR 30047</a>  | Magnetosome formation | 647 | <i>Desulfonatronum lacustre</i>                      | WP_028571663 | 0         | 99 | 61 |
| <b>Mad17-2</b><br><a href="#">EPICR 200025</a> | Magnetosome formation | 679 | <i>Ca. Magnetobacterium bavaricum</i>                | KJU83258     | 0         | 93 | 46 |
| <b>Mad30-2</b><br><a href="#">EPICR 200024</a> | Magnetosome formation | 254 | <i>Ca. Magnetobacterium casensis</i>                 | KJU83257     | 2.00E-80  | 96 | 48 |

Ca.: Candidatus; st.: strain; sp.: specie
